# Supplementary material for: Archive of bacterial community in anhydrite crystals from a deep-sea basin provides evidence of past oil-spilling in a benthic environment in the Red Sea
Source: Copernicus journal article supplement (doi:10.5194/bg-13-6405-2016), 2016-11-30
Supplement: Supplementary file 1 [file bg-13-6405-2016-supplement.pdf]

Supplement of Biogeosciences, 13, 6405–6417, 2016  
<http://www.biogeosciences.net/13/6405/2016/>  
doi:10.5194/bg-13-6405-2016-supplement  
© Author(s) 2016. CC Attribution 3.0 License.

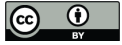

Biogeosciences  Open Access

*Supplement of*

## **Archive of bacterial community in anhydrite crystals from a deep-sea basin provides evidence of past oil-spilling in a benthic environment in the Red Sea**

**Yong Wang et al.**

*Correspondence to:* Pei-Yuan Qian (boqianpy@ust.hk) and Yong Wang (wangy@idsse.ac.cn)

The copyright of individual parts of the supplement might differ from the CC-BY 3.0 licence.

Figure S1 Geographic map of the sampling site.

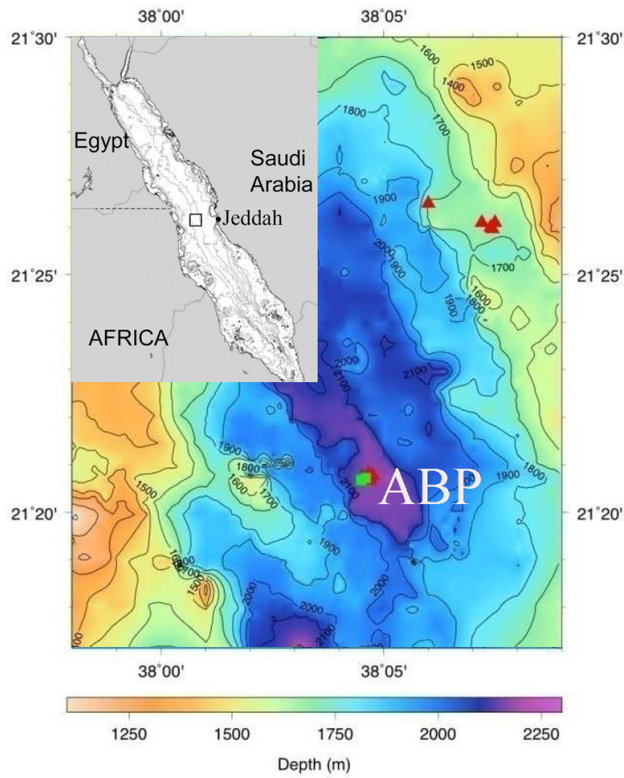

The gravity core was obtained from the bottom of the Atlantis II Deep (ABP) in 2008.

Figure S2. Genomic comparison between *Alcanivorax borkumensis* Sk2 and ABS183.

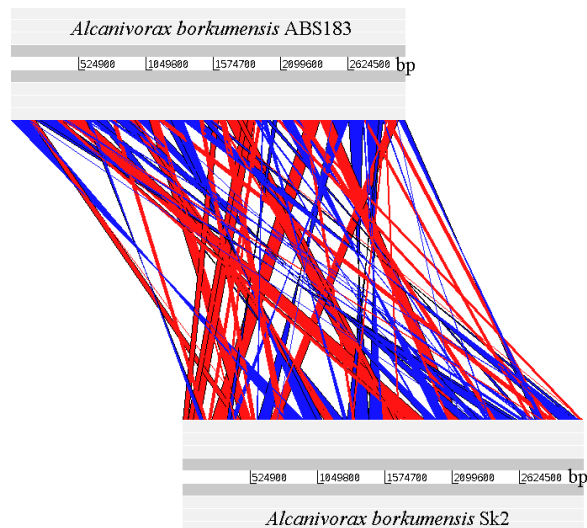

The comparison was conducted using Artemis Comparison Tool in the WebACT (webact.org).

Table S1 Sequencing statistics of metagenomes

|                   | Anhydrite | Control |
|-------------------|-----------|---------|
| Raw data          | 1.8Gbp    | 3.1Gbp  |
| Qualified         | 1.6Gbp    | 2.8Gbp  |
| MALBAC cleaned    | 0.9Gbp    | /       |
| Assembled contigs | 59Mbp     | 84Mbp   |
| N50               | 1,450bp   | 1,556bp |
| No. Contigs       | 32,266    | 78,467  |
| No. 16S rRNAs     | 30        | 45      |

The control sample was not MALBAC amplified, and therefore its metareads were not cleaned by removing MALBAC primers. For the 16S rRNAs, only those longer than 150 bp were retained.
